# Supplementary material for: Recurrent colorectal liver metastasis patients could benefit from repeat hepatic resection
Source: Springer Nature journal article supplement (doi:10.1186/s12893-021-01323-y), 2021-08-16

Supplementary Figure 1. Flow Chart of Enrolled Patients.

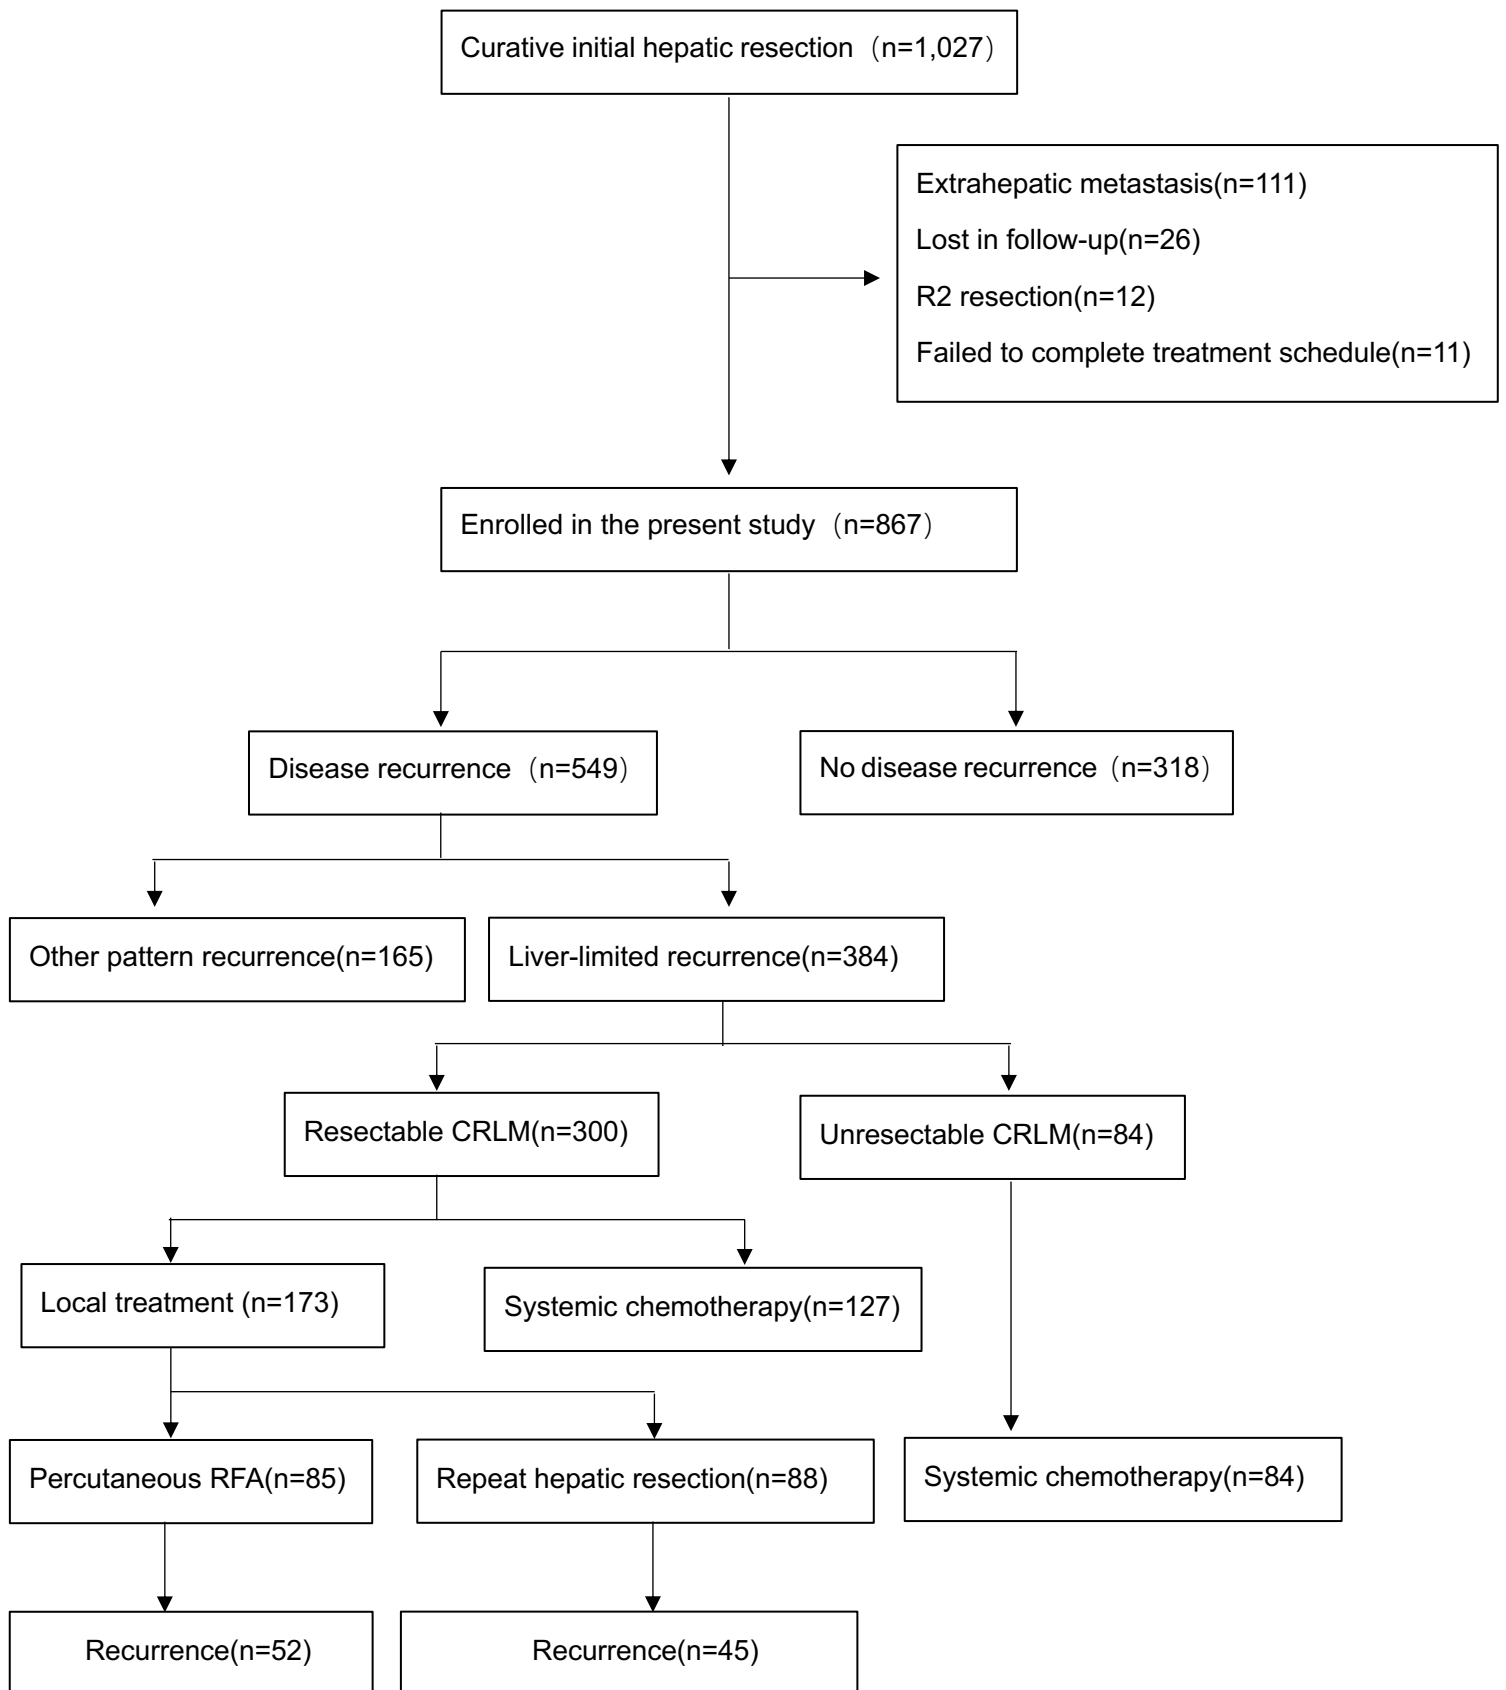

Supplement: MOESM1 [file 19574066]
